# Supplementary material for: BCG vaccination in England since 2005: a survey of policy and practice
Source: PubMed Central journal article supplement — BMJ Open. 2012 Sep 10;2(5):e001303. doi: 10.1136/bmjopen-2012-001303 (PMC3467615; doi:10.1136/bmjopen-2012-001303), 2012-09-10
Supplement: bmjopen-2012-001303.draft_revisions.pdf [file bmjopen-2012-001303.draft_revisions.pdf]

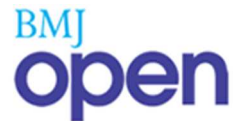

**BCG vaccination in England since 2005: a survey of policy and practice in England**

|                                 |                                                                                                                                                                                                                                                                                                                                                                                                                                                                                                                                                                           |
|---------------------------------|---------------------------------------------------------------------------------------------------------------------------------------------------------------------------------------------------------------------------------------------------------------------------------------------------------------------------------------------------------------------------------------------------------------------------------------------------------------------------------------------------------------------------------------------------------------------------|
| Journal:                        | <i>BMJ Open</i>                                                                                                                                                                                                                                                                                                                                                                                                                                                                                                                                                           |
| Manuscript ID:                  | bmjopen-2012-001303                                                                                                                                                                                                                                                                                                                                                                                                                                                                                                                                                       |
| Article Type:                   | Research                                                                                                                                                                                                                                                                                                                                                                                                                                                                                                                                                                  |
| Date Submitted by the Author:   | 18-Apr-2012                                                                                                                                                                                                                                                                                                                                                                                                                                                                                                                                                               |
| Complete List of Authors:       | Pilger, Daniel; London School of Hygiene and Tropical Medicine, Nguipdop-Djomo, Patrick; London School of Hygiene and Tropical Medicine, Abubakar, Ibrahim; Norwich Medical School, Department of Medicine; Health Protection Services, Respiratory Diseases Department<br>Elliman, David; Whittington Health,<br>Rodrigues, Laura; London School of Hygiene and Tropical Medicine<br>Watson, John; Health Protection Services, Respiratory Diseases Department<br>Eastman, Vera; Columbia University,<br>Mangtani, Punam; London School of Hygiene and Tropical Medicine |
| <b>Primary Subject Heading</b>: | Infectious diseases                                                                                                                                                                                                                                                                                                                                                                                                                                                                                                                                                       |
| Secondary Subject Heading:      | Health policy                                                                                                                                                                                                                                                                                                                                                                                                                                                                                                                                                             |
| Keywords:                       | Tuberculosis < INFECTIOUS DISEASES, Infection control < INFECTIOUS DISEASES, Health policy < HEALTH SERVICES ADMINISTRATION & MANAGEMENT, Organisational development < HEALTH SERVICES ADMINISTRATION & MANAGEMENT                                                                                                                                                                                                                                                                                                                                                        |
|                                 |                                                                                                                                                                                                                                                                                                                                                                                                                                                                                                                                                                           |

SCHOLARONE™  
Manuscripts

# BCG vaccination in England since 2005: a survey of policy and practice in England

Daniel Pilger<sup>1</sup>, Patrick Nguipdop-Djomo<sup>1</sup>, Ibrahim Abubakar<sup>2,3</sup>, David Elliman<sup>4</sup>, Laura C Rodrigues<sup>1</sup>, John M Watson<sup>3</sup>, Vera Eastman<sup>5</sup>, Punam Mangtani<sup>1</sup>

1. London School of Hygiene and Tropical Medicine, WC1E 7HT London
2. Department of Medicine, Norwich Medical School, University of East Anglia, Norwich NR4 7TJ, England
3. Respiratory Diseases Department, Health Protection Services, Colindale, NW9 5EQ London, England
4. Whittington Health, WC1N 3LU London
5. Columbia University, 10027 New York, United States of America Vera Eastman

Correspondence to:

Punam Mangtani  
London School of Hygiene and Tropical Medicine, WC1E 7HT London  
Tel: +44 (0) 20 7927 2057  
Fax: +44 (0) 20 7436 4230  
Punam.mangtani@lshtm.ac.uk

Key Words: Tuberculosis, BCG, vaccination, policy

Word count: 2986

## Abstract

**BACKGROUND:** Vaccination with BCG is a cornerstone of tuberculosis control in England. In 2005, the school age vaccination programme was abandoned in favour of a targeted infant vaccination programme. We aimed to assess the current BCG vaccination policies and delivery pathways for immunisation in Primary Care Trusts (PCT) in England since the 2005 change in recommendations.

**METHODS:** We conducted a survey of key informants across 152 PCTs in England using a standardised, structured questionnaire.

**RESULTS:** Complete questionnaires were returned from 127 (84%) PCTs. 16 (27%) PCTs reported universal infant vaccination and 111 (73%) had selective infant vaccination. Selective vaccination outside infancy was also reported from 94 (74%) PCTs. PCTs with selective infant policy most frequently vaccinated on postnatal wards (51/102, 50%) whereas PCTs with universal infant vaccination most frequently vaccinate in community clinics (9/13, 69%;  $p=0.011$ ). To identify and flag up eligible infants in PCTs with targeted infant immunisation, those that mostly vaccinate on postnatal wards depend on midwives and maternity records, whereas those that vaccinate primarily in the community rely more often on various healthcare professionals.

**CONCLUSIONS:** Targeted infant vaccination has been implemented in most PCTs across the UK. PCTs with selective infant vaccination provide BCG vaccine via a greater variety of healthcare professionals than those with universal infant vaccination policies. Data on vaccine coverage would help evaluate the effectiveness of delivery. Interruptions of delivery noted here emphasise the importance of not just an agreed, standardised, local pathway, but also a named person in charge.

## INTRODUCTION

Tuberculosis (TB) remains a public health problem in England. After a century of consistent decline in the incidence and annual infection risk, the incidence of TB has been rising since the late 1980s.[1] TB is concentrated within certain groups of the population (including migrants from high prevalence countries, prisoners, homeless persons and other marginal populations) and in urban areas.[2]

Since the 1950s, immunisation with the Bacillus Calmette-Guerin (BCG) vaccine, which has been shown to be highly effective in the UK population,[3] has been a part of TB control efforts in England. The routine policy had been primarily to administer the BCG vaccine to all tuberculin-negative schoolchildren aged 10 to 14 years. In some areas BCG was given during infancy and it was recommended that it should also be given to “children of immigrants in whose communities there is a high incidence of tuberculosis”, amongst other high risk groups.[4] In 2005, this policy was replaced by a targeted immunisation programme directed at children with high risk of TB exposure.

The change in policy came after several years of discussion in the independent government advisory committee, the Joint Committee of Vaccination and Immunisation (JCVI). In the 1990's it was estimated that due to the low TB incidence, universal school-age vaccination was no longer cost-effective.[5] Universal BCG vaccination, however, remained policy largely because the incidence was rising slowly and health authorities were unsure about the impact that the emerging HIV epidemic could have on TB epidemiology.[5, 6] In 2005, after the HIV epidemic had stabilised and the UK had already fulfilled the criteria of the International Union Against Tuberculosis and Lung Diseases (IUATLD) to stop routine immunisation (which recommends different policies for different levels of TB, based on economic appraisals and the balance between the benefits and risks of BCG vaccination),[7] the JCVI recommended stopping universal school age vaccination and replacing it with a targeted infant vaccination programme.[5]

As part of this targeted infant programme, it is agreed that universal vaccination is the most effective way to reach all eligible children in areas of the country with TB incidence  $\geq 40$  per 100 000 person-years (pyrs). In areas with TB incidence  $< 40$  per 100 000 pyrs, a selective approach is recommended to immunise only infants at high risk i.e. if their parents or grandparents originate from a country with an incidence  $\geq 40$  per 100 000 pyrs, if travelling

1  
2  
3 to a high incidence country for three or more months, or when in contact with a TB case. In  
4 addition, children of any age at high risk of TB should be vaccinated at suitable  
5 opportunities.[8]  
6

7  
8 In view of possible organisational changes in the NHS and given the current TB epidemiology  
9 in the country, we considered it important and timely to assess the BCG vaccine policy and the  
10 main vaccine delivery pathways across the commissioning bodies for community and hospital  
11 care (Primary Care Trusts, PCTs) in England.  
12  
13

## 14 15 **METHODS**

16  
17 A standardised, mostly closed ended structured questionnaire was designed; (available from  
18 the authors). The questionnaire covered the vaccination policy in and outside infancy,  
19 eligibility criteria and their documentation, delivery pathways and constraints to service  
20 delivery. The questionnaire was piloted in 4 London PCTs.  
21  
22  
23  
24

25  
26 In November 2010, we contacted all 152 PCTs in England. Immunisation leads and other  
27 staffs involved in TB control and BCG vaccination implementation were electronically mailed  
28 a copy of the questionnaire and a web-link to an internet equivalent created using the survey  
29 engine SurveyMonkey®. As delivery of BCG vaccine involves a chain of activities and  
30 responsibilities, respondents were asked to gather information from other key informants as  
31 needed. A reminder was sent after four weeks. After an additional 4 weeks, we contacted  
32 non-respondent PCTs by telephone to gather the information required.  
33  
34  
35  
36  
37

38  
39 At completion of the active data collection, as an additional data check, between August 2011  
40 and September 2011 we searched PCTs' websites and related NHS sources for publicly  
41 available documents on their current BCG vaccination policy. We assessed the agreement  
42 between the information on these publicly available documents and the data collected from  
43 the survey. We compared distribution frequencies using a chi-square test or Fishers exact  
44 test where appropriate. For each variable, we only included observations for which data was  
45 available.  
46  
47  
48  
49

## 50 51 **RESULTS**

52  
53 Between November 2010 and March 2011, 123 questionnaires representing 129/152 PCTs  
54 (85%) were returned: 72 (59%) as electronic documents and, 51 (41%) via the Internet  
55 survey. No difference in TB notification rates was found between responding and non-  
56 responding PCTs (data not presented). We found publically available current BCG policy  
57  
58  
59  
60

1  
2 documents for 114 (88%) of the 129 PCTs. Two (2%) PCTs were excluded from subsequent  
3 analysis because their BCG policy could not be determined from the responses. Sixteen (13%)  
4 PCTs reported universal infant vaccination and 111 (87%) selective infant vaccination. The  
5 agreement with publically available BCG policy documents was high, with only 3 (2%) PCTs  
6 reporting a policy that was different from the information in these documents. Responses  
7 from these three PCTs to more detailed questions in the questionnaire were consistent with a  
8 selective infant vaccination at that time.  
9

10  
11 Three PCTs reported changing their policy between 2006 and 2011; 1 PCT followed the  
12 national recommendation and changed from targeted infant vaccination to universal infant  
13 vaccination as TB incidence exceeded 40 per 100 000 pyrs; 1 PCT changed to universal infant  
14 vaccination although their TB incidence was < 40 per 100 000 pyrs but justified doing so  
15 because of a borderline TB rate, high TB rates in neighbouring areas and high population  
16 mobility; 1 PCT had a universal infant vaccination programme prior to 2006, although their  
17 TB incidence was below the threshold, and changed to targeted infant vaccination.[9]  
18  
19

20  
21 Some PCTs reported vaccination policies that did not reflect the JCVI recommendations. Six  
22 PCTs reported targeted infant vaccination despite having a 3-year average TB incidence  $\geq$  40  
23 per 100,000.[9] Documents obtained from the websites, however, of 3 of these PCTs, state  
24 that they implement universal infant BCG vaccination. Six of the 16 PCTs reporting universal  
25 vaccination had 3-year average TB incidence  $\leq$  40 per 100,000.[9] They were all in or close to  
26 major conurbations.  
27

### 28 **Vaccination during infancy**

29  
30 PCTs with a selective infant BCG vaccination policy administer BCG via a wider range of health  
31 care providers than PCTs with universal infant BCG vaccination (Table 1). PCTs with selective  
32 policy most frequently offer vaccination on postnatal wards (51/102, 50%) but also vaccinate  
33 in community (24/102, 24%) and hospital clinics (27/102, 26%); PCTs with universal policy  
34 more frequently offer vaccination in community clinics (9/13, 69%) and less frequently on  
35 postnatal wards (4/13, 31%,  $p=0.011$ ).  
36  
37

38  
39 All PCTs that vaccinate primarily on postnatal wards do so during the infants' first month of  
40 life whereas only 13/37 (35%) PCTs that mainly vaccinate in community clinics do so in the  
41 infants' first month of life ( $p<0.001$ ).  
42  
43

44  
45 BCG vaccination receipt in infancy is documented in various ways across PCTs, and this did  
46 not depend on the vaccination policy (Table 1). It is most consistently documented in the Red  
47  
48  
49  
50  
51  
52  
53  
54  
55  
56  
57  
58  
59  
60

Book (119/123, 97%) and in the Child Health Information Systems (114/123, 93%). It is also noted in other registers and notes (Table 1), but always in combination with either or both of the former two (Figure 1).

Table 1. Place were BCG is primarily administered and systems reported to document BCG vaccination in 127 PCT with infant vaccination policy.

|                                      | Selective infant vaccination<br>N=102* | Universal infant vaccination<br>N=13** |
|--------------------------------------|----------------------------------------|----------------------------------------|
| Place of primary BCG administration  | n (%)                                  | n (%)                                  |
| Postnatal ward                       | 51 (50)                                | 4 (31)                                 |
| At home                              | 0                                      | 0                                      |
| At community clinic                  | 24 (23)                                | 9 (69)                                 |
| At chest clinic                      | 17 (17)                                | 0                                      |
| At hospital paediatric clinic        | 10 (10)                                | 0                                      |
| Systems in use for BCG documentation | N=107***                               | N=16                                   |
| Antenatal/Maternity records          | 43 (40)                                | 5 (31)                                 |
| Birth notification records           | 15 (14)                                | 2 (12)                                 |
| Paper log books held by midwives     | 6 (6)                                  | 1 (6)                                  |
| Child health information system      | 100 (93)                               | 14 (88)                                |
| School health records                | 27 (25)                                | 5 (31)                                 |
| GP                                   | 50 (46)                                | 3 (19)                                 |
| Red Book                             | 103 (96)                               | 16 (100)                               |
| Discharge letters                    | 37 (35)                                | 2 (12)                                 |

\*9, \*\*3, \*\*\*4 observations with missing data

### Selective infant vaccination

In the 111 PCTs with selective infant vaccination, 71% reported routinely assessing eligibility for BCG. They all offer BCG vaccination to children with parents or grand parents born in countries with TB incidence  $\geq 40$  per 100 000 pyrs (Table 2). Six PCTs reported that travel to a high incidence country for three or more months is not an eligibility criterion; and 2 PCTs reported that contact with a TB case is not a selection criterion either.

Table 2. Selection criteria employed to decide eligibility for BCG vaccination in 111 PCTs with a targeted infant vaccination policy.

|                                                                    | n (%) <sup>*</sup> |
|--------------------------------------------------------------------|--------------------|
| Infant of parents born in country with incidence > 40 per 100 000. | 107 (100)          |
| Contact with TB                                                    | 93 (87)            |
| Prolonged travel                                                   | 94 (88)            |
| Parental request                                                   | 14 (13)            |
| Insecure accommodation                                             | 13 (12)            |
| Socially deprived                                                  | 2 (2)              |
| Asylum seeker/refugees                                             | 2 (2)              |

\* 4 observations with missing data

Two main BCG delivery pathways were apparent from the information on identification and primary place of immunisation, but with considerable overlap. Where midwives are primarily responsible for identifying eligible infants, they are more frequently vaccinated on postnatal wards (37/56, 66%) than when eligibility is flagged by GPs, health visitors (HVs) or paediatricians (12/44, 27%;  $p < 0.001$ ). Conversely, in PCTs in which eligible infants are primarily flagged up by GPs, HVs or paediatricians, they are more frequently vaccinated in community clinics (32/44, 73%) than when midwives identify them (19/56, 34%;  $p < 0.001$ ). In line with these delivery pathways, when infants are identified by midwives or vaccinated on postnatal wards, their eligibility is most frequently flagged up in maternity records, whereas when infants are identified by GPs, HVs or paediatricians or when they are vaccinated in community clinics, various systems are used with no clear preference (Table 3).

Table 3. Systems in use to flag up infants' eligibility for BCG vaccination stratified by main responsible for identification in 111 PCTs with targeted infant vaccination.

| Systems used to flag up eligibility | Identification primarily by midwives <sup>*</sup><br>N=51 | Identification primarily by GP, HV or paediatrician <sup>*</sup><br>N=38 |
|-------------------------------------|-----------------------------------------------------------|--------------------------------------------------------------------------|
| Maternity records                   | 43 (84%)                                                  | 14 (37%)                                                                 |
| Baby's hospital notes               | 28 (55%)                                                  | 18 (47%)                                                                 |
| Red Book                            | 25 (49%)                                                  | 22 (56%)                                                                 |
| Birth notification records          | 10 (20%)                                                  | 6 (16%)                                                                  |
| Child health information system     | 10 (20%)                                                  | 6 (16%)                                                                  |

\*22 observations with missing data



## Vaccination outside of infancy

Vaccination outside infancy was reported in 94/127 (74%) PCTs. In 14/94 (14%) PCTs vaccination outside of infancy is offered to preschool children only, in 9/94 (9%) to schoolchildren only and in the remaining PCTs to both groups. HVs are most frequently involved in identifying eligible pre-school children (51/85, 51%). GPs alone were mentioned by 3/85 (4%) PCTs but 33/85 (36%) PCTs reported that both GPs and HV identify eligible pre-school children. A similar pattern was seen for the identification of school children: school nurses alone identify eligible school children in 56/80 (70%) PCTs, GPs alone in 9/80 (11%) PCTs and in 15/80 (19%) PCTs both school nurses and GPs identify school children.

All PCTs offering vaccination outside infancy reported assessing previous BCG immunisation in eligible children using at least one of the criteria recommended by the Green Book. Sixty-four of 94 (68%) PCTs use a combination of reliable parental recall, documentary evidence and presence of a scar as evidence of previous BCG vaccination. Seventy of 94 (18%) PCTs use the combination of a BCG scar and reliable recall; whereas 13/94 (14%) consider only one criteria as sufficient evidence.

## Logistic constraints hindering BCG administration

Of all PCTs, 26/127 (20%) reported periods between 2005 and 2010 during which they could not administer BCG due to logistic constraints. The most frequent reasons are vaccine supply shortage and lack of trained health workers (including access to training) to administer the vaccine. One PCT reported various episodes where no BCG could be administered as a result of a pending business case over who was to carry out BCG vaccination when the previously appointed community paediatrician retired. A similar problem was reported in a different PCT reporting unclear responsibilities after the adult respiratory department stopped seeing paediatric patients. In one PCT, BCG could not be administered over a two-year period due to absence of funding agreements and was only re-introduced after a school outbreak.

## DISCUSSION

Six years after its introduction, the 2005 recommendation for BCG vaccination has been implemented in the vast majority of England PCTs. All surveyed PCTs have an infant vaccination policy in place, but a quarter of these PCTs do not report offering vaccination outside infancy. Selective infant vaccination mostly takes place on the postnatal ward and during the first month of life whereas universal infant vaccination mainly happens in

1  
2  
3 community clinics and after the first month of life. In PCTs with a selective infant vaccination  
4 policy, this survey found greater variation in the organisation of BCG vaccine delivery.  
5

6  
7 Since the JCVI issued their recommendations in 2005, there has been an on-going discussion  
8 about how to define areas of high TB incidence in the context of the policy.[10-12] Universal  
9 infant vaccination is, for operational reasons, recommended in PCTs where the TB incidence  
10 is  $\geq 40$  per 100 000 pyrs, as it is agreed that this is the most efficient way to reach all infants at  
11 high risk of TB in such areas. Nevertheless, the cut-off incidence for targeted infant  
12 vaccination is debated as children in PCTs with an incidence  $< 40$  per 100 000 pyrs can still be  
13 at high risk of TB.[13]  
14

15  
16 In this survey, six PCTs in or close to urban areas reported vaccinating all infants although  
17 their PCT-specific incidence is  $< 40$  per 100 000 pyrs. This could indicate that some PCTs in  
18 urban areas are considering regional incidence to inform their policies, rather than PCT  
19 specific incidence. Nevertheless, it remains uncertain if this strategy ensures that the  
20 maximum number of eligible children are being immunised, and if it is more cost-effective  
21 than a PCT-specific informed targeted vaccination policy. Further analysis of the economic  
22 efficiency of regional BCG vaccination is required.  
23  
24

25  
26 Surveys of BCG vaccination policies and practices in England and Wales in 1982 and 1992  
27 indicated considerable variations across health districts.[14, 15] In 1992, 15 of the 186 health  
28 districts in England had already stopped their routine school immunization programme; 148  
29 offered BCG to selected groups of neonates and five districts routinely gave BCG to all their  
30 neonates.[15] Today, variation in local BCG vaccination policies is lower but the organisation  
31 of BCG delivery remains highly variable. We find that PCTs commission a wide range of  
32 healthcare providers to deliver the vaccine. This heterogeneity across PCTs also demands a  
33 high level of organisation between PCTs if services such as maternity care straddle PCT  
34 borders. Hospitals may not be coterminous with PCTs and hence infants from PCTs with  
35 different policies and practices can be born in the same hospital. In this light, it is of concern  
36 that many PCTs don't have service level agreements (SLA) to organise BCG administration  
37 either within the PCT and across boundaries.[4] This and the complexity of managing a  
38 localised service could also explain why some PCTs were unable to deliver BCG during  
39 periods where service providers changed.  
40  
41

42  
43 The commissioning of BCG may become more complex if it becomes the responsibility of  
44 Clinical Commissioning Consortia. In its current form, the suggested changes to the NHS  
45 structure could lead to consortia responsible for overlapping geographical areas. If services  
46

1  
2 are not commissioned across boundaries and responsibilities are not clearly assigned, the  
3 current heterogeneity in policies and practices could increase and seriously compromise the  
4 targeted infant vaccination. Infant hepatitis B vaccination is another selective programme,  
5 being given to infants of mothers screened antenatally and found to be positive for hepatitis B  
6 carriage. It works best when there is an identified person in each area, who is responsible for  
7 co-ordinating the programme.[16] This model should be considered for the BCG programme.  
8  
9

10  
11 While the structural organisation of the NHS poses challenges for the 2005 recommendations,  
12 the implementation of a targeted vaccination policy is, in its self, demanding.[17] Hence, it is  
13 vital to monitor the implementation to assure high vaccination coverage. Good data on BCG  
14 immunisation coverage is complicated to assemble in PCTs with targeted infant vaccination  
15 where the denominator is unclear. Data from audits, however, show that vaccination  
16 coverage in areas with targeted infant vaccination can be low [18] and that even in PCTs with  
17 high coverage, it can vary greatly between maternity units [19] and ethnic groups.[20] We  
18 find that a wide range of health care professionals are involved in the identification of eligible  
19 children. It is therefore conceivable that infants are not identified due to unclear  
20 responsibilities. In addition, our findings suggest that some health professionals involved in  
21 the BCG vaccination program might be unfamiliar with recommended eligibility criteria; this  
22 could contribute to low coverage rates.[21] A standardised pathway to identify eligible infants,  
23 with clear responsibilities and roles and regular training of staffs involved could contribute to  
24 high vaccination coverage in PCTs with selective vaccination policy.[22, 23]  
25  
26

27  
28 In addition to the correct identification of infants at risk, assuring that the vaccine is  
29 administered is another challenge of a targeted vaccination policy.[17, 22] Half of the PCTs  
30 vaccinate on postnatal wards – a vaccine delivery pathway associated with high vaccination  
31 coverage in local audits.[22-24] The other half, however, vaccinate in a community setting or  
32 clinics which in this survey was associated with vaccination at an older age. The different  
33 delivery pathways probably reflect local circumstances. Immunising newborns in postnatal  
34 wards may be more optimal in conditions in which the workload is manageable at that level,  
35 with either a relatively lower number of eligible newborns, or a sufficient number of skilled  
36 personnel to administer BCG. Vaccinating in the community might be more effective in areas  
37 with higher numbers of eligible newborn (especially if universal BCG vaccination) and limited  
38 number of trained staffs to administer the vaccine in postnatal wards. However, the latter  
39 could mean a higher risk of attrition as parents may not return their children to immunisation  
40 appointments, as reported in previous audits.[23, 25] A study in South London found that  
41  
42  
43  
44  
45  
46  
47  
48  
49  
50  
51  
52  
53  
54  
55  
56  
57  
58  
59  
60

1  
2 parents would be more interested if the vaccine was accessible on a “drop-in” basis from  
3 community clinics [18] in such areas.  
4

5  
6 Another aspect that might affect efficient delivery is that the most commonly used systems for  
7 documentation of BCG receipt are often not the systems used to flag up eligibility. Aligning  
8 the systems used to identify eligible children with the system used to document BCG  
9 vaccination could be an effective way to ensure that identified infants receive the vaccine and  
10 a means to estimate coverage.[24] Also, BCG vaccination was not delivered with other routine  
11 infant vaccinations possibly because of the need for specific training for an intradermal  
12 vaccination. The addition of BCG vaccination to the offer of other routine infant vaccinations  
13 in specific regions could be another way of ensuring coverage of those at risk.  
14  
15

16  
17 The 2005 BCG policy for the UK also recommends vaccinating previously unvaccinated  
18 children who are at high risk of TB. Despite the policy, a quarter of all PCTs do not report  
19 vaccinating outside infancy. Although the absence of vaccination outside infancy may  
20 conserve resources in areas with low levels of migration, some PCTs in urban centres with  
21 presumably high levels of migration do not report vaccinating outside infancy. This suggests  
22 that greater efforts are needed to strengthen targeted BCG vaccination outside infancy.  
23  
24

25  
26 In conclusion, a targeted infant BCG vaccination has been implemented in most PCTs across  
27 England, either as part of postnatal hospital care or a community vaccination programme  
28 separate from other childhood vaccinations via a number of locally agreed health-care  
29 professionals. Information to assess coverage would be useful to monitor successful  
30 provision of an effective measure to prevent childhood tuberculosis.  
31  
32

### 33 34 35 36 37 38 39 40 41 42 43 **ACKNOWLEDGEMENTS**

44  
45 The authors wish to thank all who took part in the survey. We also thank Ms Joanne White  
46 from the HPA-Colindale for providing the list of immunisation leads in PCTs, as well as useful  
47 discussions on BCG vaccine delivery in the UK. PM and PND thank NIHR (HTA) for funding. IA  
48 is funded through an NIHR Senior Research Fellowship.  
49  
50  
51  
52

### 53 54 55 56 57 **COMPETING INTERESTS**

1  
2  
3 "All authors have completed the Unified Competing Interest form at  
4 www.icmje.org/coi\_disclosure.pdf (available on request from the corresponding author) and  
5 declare: no support from any organisation for the submitted work other than mentioned in  
6 acknowledgements; no financial relationships with any organisations that might have an  
7 interest in the submitted work in the previous 3 years; no other relationships or activities that  
8 could appear to have influenced the submitted work."  
9  
10  
11

### 12 13 **CONTRIBUTION OF AUTHORS**

14  
15  
16 PM, IA, LR had the initial idea for the study and design the survey instrument with DE. VE and  
17 DP helped test the instrument. DP collected responses, analysed and interpreted them and did  
18 the initial draft of the manuscript. PND helped with data collection, analysis, and with DP and  
19 PM interpreted the results and edited the manuscript. JW contributed to the interpretation of  
20 results. All authors contributed to the final manuscript. All authors had access to all data in  
21 the study and held final responsibility for the decision to submit for publication.  
22  
23  
24  
25

### 26 27 **FUNDING**

28  
29 This study received no specific financial support.  
30  
31

### 32 33 **COPYRIGHT**

34  
35 "The Corresponding Author has the right to grant on behalf of all authors and does grant on  
36 behalf of all authors, an exclusive licence (or non-exclusive for government employees) on a  
37 worldwide basis to the BMJ Group and co-owners or contracting owning societies (where  
38 published by the BMJ Group on their behalf), and its Licensees to permit this article (if  
39 accepted) to be published in BMJ Thorax and any other BMJ Group products and to exploit all  
40 subsidiary rights, as set out in our licence."  
41  
42  
43  
44  
45  
46  
47

### 48 49 **REFERENCES**

- 50  
51 1. Health Protection Agency. Tuberculosis in the UK: annual report on tuberculosis  
52 surveillance in the UK 2010. London: HPA2010.  
53 2. Abubakar I, Lipman M, Anderson C, et al. Tuberculosis in the UK--time to regain control.  
54 *BMJ*. 2011;**343**:d4281.  
55 3. B.C.G. AND vole bacillus vaccines in the prevention of tuberculosis in adolescents; first  
56 (progress) report to the Medical Research Council by their Tuberculosis Vaccines Clinical  
57 Trials Committee. *Br Med J*. 1956;**1**:413-27.  
58  
59  
60

- 1
  - 2
  - 3
  - 4
  - 5
  - 6
  - 7
  - 8
  - 9
  - 10
  - 11
  - 12
  - 13
  - 14
  - 15
  - 16
  - 17
  - 18
  - 19
  - 20
  - 21
  - 22
  - 23
  - 24
  - 25
  - 26
  - 27
  - 28
  - 29
  - 30
  - 31
  - 32
  - 33
  - 34
  - 35
  - 36
  - 37
  - 38
  - 39
  - 40
  - 41
  - 42
  - 43
  - 44
  - 45
  - 46
  - 47
  - 48
  - 49
  - 50
  - 51
  - 52
  - 53
  - 54
  - 55
  - 56
  - 57
  - 58
  - 59
  - 60
4. The Standing Medical Advisory Committee for the Central Health Services Council, The Secretary of State for Social Services, The Secretary of State for Scotland, et al. Immunisation against infectious disease. London: Department of Health and Social Security; 1972.
5. Joint Committee on Vaccination and Immunisation. Minutes of the JCVI BCG Subgroup, Thursday 7 April 2005. 2005.
6. Fine P. Stopping routine vaccination for tuberculosis in schools. *BMJ*. 2005;**331**:647-8.
7. Criteria for discontinuation of vaccination programmes using Bacille Calmette-Guerin (BCG) in countries with a low prevalence of tuberculosis. A statement of the International Union Against Tuberculosis and Lung Disease. *Tuber Lung Dis*. 1994;**75**:179-80.
8. Department of Health. Tuberculosis. In: Salisbury D, Ramsay M, Noakes K, editors. Immunisation against Infectious Diseases. Norwich: The Stationery Office; 2006.
9. Health Protection Agency. Geography - TB data by UK primary care organisation. 2010 [cited 2011 September]; Available from: [http://www.hpa.org.uk/web/HPAweb&HPAwebStandard/HPAweb\\_C/1287147465528](http://www.hpa.org.uk/web/HPAweb&HPAwebStandard/HPAweb_C/1287147465528).
10. Ahmed AB, King K. Change in BCG Vaccination policy – Unresolved Issues of implementation. *BMJ*. 2005.
11. Department of Health. Operational note to profession *Changes to the BCG vaccination programme in England*. 2005.
12. Ruwende JE, Sanchez-Padilla E, Maguire H, et al. Recent trends in tuberculosis in children in London. *J Public Health (Oxf)*. 2011;**33**:175-81.
13. Eriksen J, Chow JY, Mellis V, et al. Protective effect of BCG vaccination in a nursery outbreak in 2009: time to reconsider the vaccination threshold? *Thorax*. 2010;**65**:1067-71.
14. Miller CL, Morris J, Pollock TM. PHLs inquiry into current BCG vaccination policy. *Br Med J (Clin Res Ed)*. 1984;**288**:564.
15. Joseph CA, Watson JM, Fern KJ. BCG immunisation in England and Wales: a survey of policy and practice in schoolchildren and neonates. *BMJ*. 1992;**305**:495-8.
16. National Institute for Health and Clinical Excellence. NICE public health guidance 21: Reducing differences in the uptake of immunisations (including targeted vaccination) among children and young people aged under 19 years. 2009.
17. Smith CP, Parle M, Morris DJ. Implementation of government recommendations for immunising infants at risk of hepatitis B. *BMJ*. 1994;**309**:1339.
18. Tseng E, Nesbitt A, O'Sullivan D. Audit of the implementation of selective neonatal BCG immunisation in south east London. *Commun Dis Rep CDR Rev*. 1997;**7**:R165-8.
19. Etuwewe O, Wood A, Lyon A. Delivering a selective neonatal BCG vaccination programme in a multi-ethnic community: an audit of the neonatal BCG immunisation programme in Birmingham and Solihull. *Commun Dis Public Health*. 2004;**7**:172-6.
20. Srinivasan R, Menon L, Stevens P, et al. Ethnic differences in selective neonatal BCG immunisation: white British children miss out. *Thorax*. 2006;**61**:247-9.
21. Gordon M, Roberts H, Odeka E. Knowledge and attitudes of parents and professionals to neonatal BCG vaccination in light of recent UK policy changes: a questionnaire study. *BMC Infect Dis*. 2007;**7**:82.
22. Ahmed S, Hicks NR, Stanwell-Smith R. Policy and practice--an audit of neonatal BCG immunization in Avon. *J Public Health Med*. 1992;**14**:389-92.
23. Gill J, Scott J. Improving the uptake of selective neonatal BCG immunisation. *Commun Dis Public Health*. 1998;**1**:281-2.
24. Chappel D, Fernandes V. Improving the coverage of neonatal BCG vaccination. *J Public Health Med*. 1996;**18**:308-12.
25. Bakshi D, Sharief N. Selective neonatal BCG vaccination. *Acta Paediatr*. 2004;**93**:1207-9.

1  
2  
3 **Box:** What does this paper add  
4

5 What is known  
6

7  
8 An important control measure, especially in the era of multidrug resistant tuberculosis, is BCG  
9 vaccination. In 2005 the UK moved from a school aged universal BCG vaccination policy to  
10 a targeted policy towards children at high risk. To date, it is unknown how this vaccination  
11 policy is operating at the local level (via Primary Care Trusts, PCTs)  
12  
13

14  
15 What this study adds  
16

17  
18 Targeted infant vaccination has been implemented in most areas in England, but delivery  
19 pathways are complex and appear to vary between PCTs. Areas with selective infant  
20 vaccination provide BCG vaccine via a larger number of healthcare providers than those with  
21 universal infant vaccination policies. These findings emphasize the need to standardize local  
22 pathways, allocate clear responsibilities and to monitor vaccination coverage.  
23  
24  
25  
26  
27  
28  
29  
30  
31  
32  
33  
34  
35  
36  
37  
38  
39  
40  
41  
42  
43  
44  
45  
46  
47  
48  
49  
50  
51  
52  
53  
54  
55  
56  
57  
58  
59  
60

1  
2  
3  
4  
5  
6  
7  
8  
9  
10  
11  
12  
13  
14  
15  
16  
17  
18  
19  
20  
21  
22  
23  
24  
25  
26  
27  
28  
29  
30  
31  
32  
33  
34  
35  
36  
37  
38  
39  
40  
41  
42  
43  
44  
45  
46  
47  
48  
49  
50  
51  
52  
53  
54  
55  
56  
57  
58  
59  
60

Figure 1. Principal systems used to document BCG vaccination and their combinations in PCTs with infant vaccination policy (N=123).

For peer review only



1  
2  
3  
4  
5  
6  
7  
8  
9  
10  
11  
12  
13  
14  
15  
16  
17  
18  
19  
20  
21  
22  
23  
24  
25  
26  
27  
28  
29  
30  
31  
32  
33  
34  
35  
36  
37  
38  
39  
40  
41  
42  
43  
44  
45  
46  
47  
48  
49  
50  
51  
52  
53  
54  
55  
56  
57  
58  
59  
60

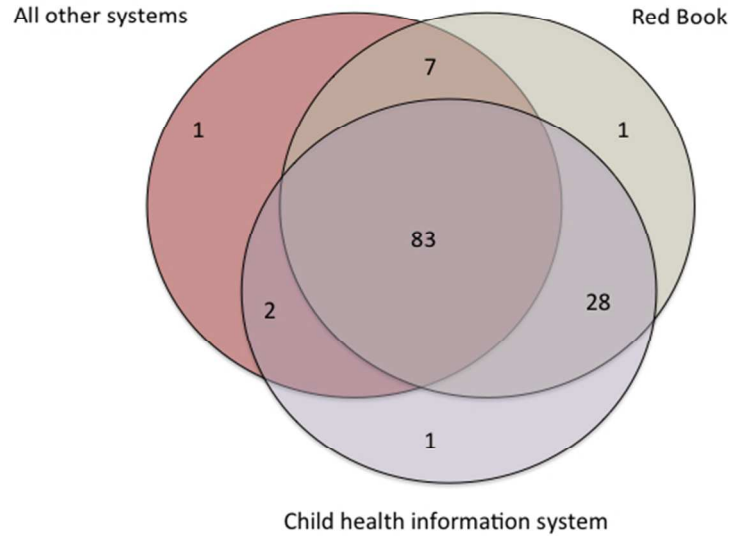

Principal systems used to document BCG vaccination and their combinations in PCTs with infant vaccination policy (N=123).

254x190mm (72 x 72 DPI)

ew only



**BCG vaccination in England since 2005: a survey of policy and practice in England**

|                                 |                                                                                                                                                                                                                                                                                                                                                                                                                                                                                                                                                                           |
|---------------------------------|---------------------------------------------------------------------------------------------------------------------------------------------------------------------------------------------------------------------------------------------------------------------------------------------------------------------------------------------------------------------------------------------------------------------------------------------------------------------------------------------------------------------------------------------------------------------------|
| Journal:                        | <i>BMJ Open</i>                                                                                                                                                                                                                                                                                                                                                                                                                                                                                                                                                           |
| Manuscript ID:                  | bmjopen-2012-001303.R1                                                                                                                                                                                                                                                                                                                                                                                                                                                                                                                                                    |
| Article Type:                   | Research                                                                                                                                                                                                                                                                                                                                                                                                                                                                                                                                                                  |
| Date Submitted by the Author:   | 03-Jul-2012                                                                                                                                                                                                                                                                                                                                                                                                                                                                                                                                                               |
| Complete List of Authors:       | Pilger, Daniel; London School of Hygiene and Tropical Medicine, Nguipdop-Djomo, Patrick; London School of Hygiene and Tropical Medicine, Abubakar, Ibrahim; Norwich Medical School, Department of Medicine; Health Protection Services, Respiratory Diseases Department<br>Elliman, David; Whittington Health,<br>Rodrigues, Laura; London School of Hygiene and Tropical Medicine<br>Watson, John; Health Protection Services, Respiratory Diseases Department<br>Eastman, Vera; Columbia University,<br>Mangtani, Punam; London School of Hygiene and Tropical Medicine |
| <b>Primary Subject Heading</b>: | Infectious diseases                                                                                                                                                                                                                                                                                                                                                                                                                                                                                                                                                       |
| Secondary Subject Heading:      | Health policy, Pharmacology and therapeutics, Paediatrics                                                                                                                                                                                                                                                                                                                                                                                                                                                                                                                 |
| Keywords:                       | Tuberculosis < INFECTIOUS DISEASES, Infection control < INFECTIOUS DISEASES, Health policy < HEALTH SERVICES ADMINISTRATION & MANAGEMENT, Organisational development < HEALTH SERVICES ADMINISTRATION & MANAGEMENT                                                                                                                                                                                                                                                                                                                                                        |
|                                 |                                                                                                                                                                                                                                                                                                                                                                                                                                                                                                                                                                           |

SCHOLARONE™  
Manuscripts

## BCG vaccination in England since 2005: a survey of policy and practice in England

Daniel Pilger<sup>1</sup>, Patrick Nguipdop-Djomo<sup>1</sup>, Ibrahim Abubakar<sup>2,3</sup>, David Elliman<sup>4</sup>, Laura C Rodrigues<sup>1</sup>, John M Watson<sup>3</sup>, Vera Eastman<sup>5</sup>, Punam Mangtani<sup>1</sup>

1. London School of Hygiene and Tropical Medicine, WC1E 7HT London
2. Department of Medicine, Norwich Medical School, University of East Anglia, Norwich NR4 7TJ, England
3. Respiratory Diseases Department, Health Protection Services, Colindale, NW9 5EQ London, England
4. Whittington Health, WC1N 3LU London
5. Columbia University, 10027 New York, United States of America Vera Eastman

Correspondence to:

Punam Mangtani  
London School of Hygiene and Tropical Medicine, WC1E 7HT London  
Tel: +44 (0) 20 7927 2057  
Fax: +44 (0) 20 7436 4230  
Punam.Mangtani@lshtm.ac.uk

Key Words: Tuberculosis, BCG, vaccination, policy

Word count: 3017

## Abstract

**BACKGROUND:** Vaccination with BCG is a cornerstone of tuberculosis control in England. In 2005, the school age vaccination programme was abandoned in favour of a targeted infant vaccination programme. We aimed to assess the current BCG vaccination policies and delivery pathways for immunisation in Primary Care Trusts (PCT) in England since the 2005 change in recommendations.

**METHODS:** We conducted a survey of key informants across 152 PCTs in England using a standardised, structured questionnaire.

**RESULTS:** Complete questionnaires were returned from 127 (84%) PCTs. 16 (27%) PCTs reported universal infant vaccination and 111 (73%) had selective infant vaccination. Selective vaccination outside infancy was also reported from 94 (74%) PCTs. PCTs with selective infant policy most frequently vaccinated on postnatal wards (51/102, 50%) whereas PCTs with universal infant vaccination most frequently vaccinate in community clinics (9/13, 69%;  $p=0.011$ ). To identify and flag up eligible infants in PCTs with targeted infant immunisation, those that mostly vaccinate on postnatal wards depend on midwives and maternity records, whereas those that vaccinate primarily in the community rely more often on various healthcare professionals.

**CONCLUSIONS:** Targeted infant vaccination has been implemented in most PCTs across the UK. PCTs with selective infant vaccination provide BCG vaccine via a greater variety of health-care professionals than those with universal infant vaccination policies. Data on vaccine coverage would help evaluate the effectiveness of delivery. Interruptions of delivery noted here emphasise the importance of not just an agreed, standardised, local pathway, but also a named person in charge.

## INTRODUCTION

Tuberculosis (TB) remains a public health problem in England. After a century of consistent decline in the incidence and annual infection risk, the incidence of TB has been rising since the late 1980s.[1] TB is concentrated within certain groups of the population (including migrants from high prevalence countries, prisoners, homeless persons and other marginal populations) and in urban areas.[2]

Since the 1950s, immunisation with the Bacillus Calmette-Guerin (BCG) vaccine, which has been shown to be highly effective in the UK population,[3] has been a part of TB control efforts in England. The routine policy had been primarily to administer the BCG vaccine to all tuberculin-negative schoolchildren aged 10 to 14 years. In some areas BCG was given during infancy and it was recommended that it should also be given to “children of immigrants in whose communities there is a high incidence of tuberculosis”, amongst other high risk groups.[4] In 2005, this policy was replaced by a targeted immunisation programme directed at children with high risk of TB exposure.

The change in policy came after several years of discussion in the independent government advisory committee, the Joint Committee of Vaccination and Immunisation (JCVI). In the 1990's it was estimated that due to the low TB incidence, universal school-age vaccination was no longer cost-effective.[5] Universal BCG vaccination, however, remained policy largely because the incidence was rising slowly and health authorities were unsure about the impact that the emerging HIV epidemic could have on TB epidemiology.[5, 6] In 2005, after the HIV epidemic had stabilised and the UK had already fulfilled the criteria of the International Union Against Tuberculosis and Lung Diseases (IUATLD) to stop routine immunisation (which recommends different policies for different levels of TB, based on economic appraisals and the balance between the benefits and risks of BCG vaccination),[7] the JCVI recommended stopping universal school age vaccination and replacing it with a targeted infant vaccination programme.[5]

As part of this targeted infant programme, it is agreed that universal vaccination is the most effective way to reach all eligible children in areas of the country with TB incidence  $\geq 40$  per 100 000 person-years (pyrs). In areas with TB incidence  $< 40$  per 100 000 pyrs, a selective approach is recommended to immunise only infants at high risk i.e. if their parents or grandparents originate from a country with an incidence  $\geq 40$  per 100 000 pyrs, if travelling

1  
2  
3  
4  
5  
6  
7 to a high incidence country for three or more months, or when in contact with a TB case. In  
8 addition, children of any age at high risk of TB should be vaccinated at suitable  
9 opportunities.[8]  
10

11 In view of possible organisational changes in the NHS and given the current TB epidemiology  
12 in the country, we considered it important and timely to assess the BCG vaccine policy and the  
13 main vaccine delivery pathways across the commissioning bodies for community and hospital  
14 care (Primary Care Trusts, PCTs) in England.  
15  
16

## 17 **METHODS**

18  
19 A standardised, mostly closed ended structured questionnaire was designed; (available from  
20 the authors). The questionnaire covered the vaccination policy in and outside infancy,  
21 eligibility criteria and their documentation, delivery pathways and constraints to service  
22 delivery. The questionnaire was piloted in 4 London PCTs.  
23  
24  
25

26 In November 2010, we contacted all 152 PCTs in England. Immunisation leads and other  
27 staffs involved in TB control and BCG vaccination implementation were electronically mailed  
28 a copy of the questionnaire and a web-link to an internet equivalent created using the survey  
29 engine SurveyMonkey®. As delivery of BCG vaccine involves a chain of activities and  
30 responsibilities, respondents were asked to gather information from other key informants as  
31 needed. A reminder was sent after four weeks. After an additional 4 weeks, we contacted  
32 non-respondent PCTs by telephone to gather the information required.  
33  
34  
35  
36

37 At completion of the active data collection, as an additional data check, between August 2011  
38 and September 2011 we searched PCTs' websites and related NHS sources for publicly  
39 available documents on their current BCG vaccination policy. We assessed the agreement  
40 between the information on these publicly available documents and the data collected from  
41 the survey. We compared distribution frequencies using a chi-square test or Fishers exact  
42 test where appropriate. For each variable, we only included observations for which data was  
43 available.  
44  
45  
46  
47

## 48 **RESULTS**

49  
50 Between November 2010 and March 2011, 123 questionnaires representing 129/152 PCTs  
51 (85%) were returned: 72 (59%) as electronic documents and, 51 (41%) via the Internet  
52 survey. No difference in TB notification rates was found between responding and non-  
53 responding PCTs (data not presented). We found publically available current BCG policy  
54  
55  
56

documents for 114 (88%) of the 129 PCTs. Two (2%) PCTs were excluded from subsequent analysis because their BCG policy could not be determined from the responses. Sixteen (13%) PCTs reported universal infant vaccination and 111 (87%) selective infant vaccination. The agreement with publically available BCG policy documents was high, with only 3 (2%) PCTs reporting a policy that was different from the information in these documents. Responses from these three PCTs to more detailed questions in the questionnaire were consistent with a selective infant vaccination at that time.

Three PCTs reported changing their policy between 2006 and 2011; 1 PCT followed the national recommendation and changed from targeted infant vaccination to universal infant vaccination as TB incidence exceeded 40 per 100 000 pyrs; 1 PCT changed to universal infant vaccination although their TB incidence was < 40 per 100 000 pyrs but justified doing so because of a borderline TB rate, high TB rates in neighbouring areas and high population mobility; 1 PCT had a universal infant vaccination programme prior to 2006, although their TB incidence was below the threshold, and changed to targeted infant vaccination.[9]

Some PCTs reported vaccination policies that did not reflect the JCVI recommendations. Six PCTs reported targeted infant vaccination despite having a 3-year average TB incidence  $\geq 40$  per 100,000.[9] Documents obtained from the websites, however, of 3 of these PCTs, state that they implement universal infant BCG vaccination. Six of the 16 PCTs reporting universal vaccination had 3-year average TB incidence  $\leq 40$  per 100,000.[9] They were all in or close to major conurbations.

### **Vaccination during infancy**

PCTs with a selective infant BCG vaccination policy administer BCG via a wider range of health care providers than PCTs with universal infant BCG vaccination (Table 1). PCTs with selective policy most frequently offer vaccination on postnatal wards (51/102, 50%) but also vaccinate in community (24/102, 24%) and hospital clinics (27/102, 26%); PCTs with universal policy more frequently offer vaccination in community clinics (9/13, 69%) and less frequently on postnatal wards (4/13, 31%,  $p=0.011$ ).

All PCTs that vaccinate primarily on postnatal wards do so during the infants' first month of life whereas only 13/37 (35%) PCTs that mainly vaccinate in community clinics do so in the infants' first month of life ( $p<0.001$ ).

BCG vaccination receipt in infancy is documented in various ways across PCTs, and this did not depend on the vaccination policy (Table 1). It is most consistently documented in the Red

Book (119/123, 97%) and in the Child Health Information Systems (114/123, 93%). It is also noted in other registers and notes (Table 1), but always in combination with either or both of the former two (Figure 1).

Table 1. Place where BCG is primarily administered and systems reported to document BCG vaccination in 127 PCT with infant vaccination policy.

|                                      | Selective infant vaccination<br>N=102*<br>n (%) | Universal infant vaccination<br>N=13**<br>n (%) |
|--------------------------------------|-------------------------------------------------|-------------------------------------------------|
| Place of primary BCG administration  |                                                 |                                                 |
| Postnatal ward                       | 51 (50)                                         | 4 (31)                                          |
| At home                              | 0                                               | 0                                               |
| At community clinic                  | 24 (23)                                         | 9 (69)                                          |
| At chest clinic                      | 17 (17)                                         | 0                                               |
| At hospital paediatric clinic        | 10 (10)                                         | 0                                               |
| Systems in use for BCG documentation | N=107***                                        | N=16                                            |
| Antenatal/Maternity records          | 43 (40)                                         | 5 (31)                                          |
| Birth notification records           | 15 (14)                                         | 2 (12)                                          |
| Paper log books held by midwives     | 6 (6)                                           | 1 (6)                                           |
| Child health information system      | 100 (93)                                        | 14 (88)                                         |
| School health records                | 27 (25)                                         | 5 (31)                                          |
| GP                                   | 50 (46)                                         | 3 (19)                                          |
| Red Book                             | 103 (96)                                        | 16 (100)                                        |
| Discharge letters                    | 37 (35)                                         | 2 (12)                                          |

\*9, \*\*3, \*\*\*4 missing values for those variables

Comment [ M1]: Clarification on missing observations

### Selective infant vaccination

In the 111 PCTs with selective infant vaccination, 71% reported routinely assessing eligibility for BCG. They all offer BCG vaccination to children with parents or grand parents born in countries with TB incidence  $\geq 40$  per 100 000 pyrs (Table 2). Six PCTs reported that travel to a high incidence country for three or more months is not an eligibility criterion; and 2 PCTs reported that contact with a TB case is not a selection criterion either.



Table 2. Selection criteria employed to decide eligibility for BCG vaccination in 111 PCTs with a targeted infant vaccination policy.

|                                                                    | n (%)*    |
|--------------------------------------------------------------------|-----------|
| Infant of parents born in country with incidence > 40 per 100 000. | 107 (100) |
| Contact with TB                                                    | 93 (87)   |
| Prolonged travel                                                   | 94 (88)   |
| Parental request                                                   | 14 (13)   |
| Insecure accommodation                                             | 13 (12)   |
| Socially deprived                                                  | 2 (2)     |
| Asylum seeker/refugees                                             | 2 (2)     |

\* 4 observations with missing data

Two main BCG delivery pathways were apparent from the information on identification and primary place of immunisation, but with considerable overlap. Where midwives are primarily responsible for identifying eligible infants, they are more frequently vaccinated on postnatal wards (37/56, 66%) than when eligibility is flagged by GPs, health visitors (HVs) or paediatricians (12/44, 27%;  $p < 0.001$ ). Conversely, in PCTs in which eligible infants are primarily flagged up by GPs, HVs or paediatricians, they are more frequently vaccinated in community clinics (32/44, 73%) than when midwives identify them (19/56, 34%;  $p < 0.001$ ). In line with these delivery pathways, when infants are identified by midwives or vaccinated on postnatal wards, their eligibility is most frequently flagged up in maternity records, whereas when infants are identified by GPs, HVs or paediatricians or when they are vaccinated in community clinics, various systems are used with no clear preference (Table 3).

Table 3. Systems in use to flag up infants' eligibility for BCG vaccination stratified by main responsible for identification in 111 PCTs with targeted infant vaccination.

| Systems used to flag up eligibility | Identification primarily by midwives* | Identification primarily by GP, HV or paediatrician* |
|-------------------------------------|---------------------------------------|------------------------------------------------------|
|                                     | N=51                                  | N=38                                                 |
| Maternity records                   | 43 (84%)                              | 14 (37%)                                             |
| Baby's hospital notes               | 28 (55%)                              | 18 (47%)                                             |
| Red Book                            | 25 (49%)                              | 22 (56%)                                             |
| Birth notification records          | 10 (20%)                              | 6 (16%)                                              |
| Child health information system     | 10 (20%)                              | 6 (16%)                                              |

\*22 observations with missing data

### **Vaccination outside of infancy**

Vaccination outside infancy was reported in 94/127 (74%) PCTs. In 14/94 (14%) PCTs vaccination outside of infancy is offered to preschool children only, in 9/94 (9%) to schoolchildren only and in the remaining PCTs to both groups. HVs are most frequently involved in identifying eligible pre-school children (51/85, 51%). GPs alone were mentioned by 3/85 (4%) PCTs but 33/85 (36%) PCTs reported that both GPs and HV identify eligible pre-school children. A similar pattern was seen for the identification of school children: school nurses alone identify eligible school children in 56/80 (70%) PCTs, GPs alone in 9/80 (11%) PCTs and in 15/80 (19%) PCTs both school nurses and GPs identify school children.

All PCTs offering vaccination outside infancy reported assessing previous BCG immunisation in eligible children using at least one of the criteria recommended by the Green Book. Sixty-four of 94 (68%) PCTs use a combination of reliable parental recall, documentary evidence and presence of a scar as evidence of previous BCG vaccination. Seventy of 94 (18%) PCTs use the combination of a BCG scar and reliable recall; whereas 13/94 (14%) consider only one criteria as sufficient evidence.

### **Logistic constraints hindering BCG administration**

Of all PCTs, 26/127 (20%) reported periods between 2005 and 2010 during which they could not administer BCG due to logistic constraints. The most frequent reasons are vaccine supply shortage and lack of trained health workers (including access to training) to administer the vaccine. One PCT reported various episodes where no BCG could be administered as a result of a pending business case over who was to carry out BCG vaccination when the previously appointed community paediatrician retired. A similar problem was reported in a different PCT reporting unclear responsibilities after the adult respiratory department stopped seeing paediatric patients. In one PCT, BCG could not be administered over a two-year period due to absence of funding agreements and was only re-introduced after a school outbreak.

### **DISCUSSION**

Six years after its introduction, the 2005 recommendation for BCG vaccination has been implemented in the vast majority of England PCTs. All surveyed PCTs have an infant vaccination policy in place, but a quarter of these PCTs do not report offering vaccination outside infancy. Selective infant vaccination mostly takes place on the postnatal ward and during the first month of life whereas universal infant vaccination mainly happens in

community clinics and after the first month of life. In PCTs with a selective infant vaccination policy, this survey found greater variation in the organisation of BCG vaccine delivery.

We were unable to gather information from 15% of the PCTs. However, TB notification rates between responding and non-responding PCTs were similar, suggesting results presented are not likely to be biased.

**Comment [ M2]:** Paragraph addressing the limitations of the study and non-response bias.

Since the JCVI issued their recommendations in 2005, there has been an on-going discussion about how to define areas of high TB incidence in the context of the policy.[10-12] Universal infant vaccination is, for operational reasons, recommended in PCTs where the TB incidence is  $\geq 40$  per 100 000 pyrs, as it is agreed that this is the most efficient way to reach all infants at high risk of TB in such areas. Nevertheless, the cut-off incidence for targeted infant vaccination is debated as children in PCTs with an incidence  $< 40$  per 100 000 pyrs can still be at high risk of TB.[13]

In this survey, six PCTs in or close to urban areas reported vaccinating all infants although their PCT-specific incidence is  $< 40$  per 100 000 pyrs. This could indicate that some PCTs in urban areas are considering regional incidence to inform their policies, rather than PCT specific incidence. Nevertheless, it remains uncertain if this strategy ensures that the maximum number of eligible children are being immunised, and if it is more cost-effective than a PCT-specific informed targeted vaccination policy. Further analysis of the economic efficiency of regional BCG vaccination is required.

Surveys of BCG vaccination policies and practices in England and Wales in 1982 and 1992 indicated considerable variations across health districts.[14, 15] In 1992, 15 of the 186 health districts in England had already stopped their routine school immunization programme; 148 offered BCG to selected groups of neonates and five districts routinely gave BCG to all their neonates.[15] Today, variation in local BCG vaccination policies is lower but the organisation of BCG delivery remains highly variable. We find that PCTs commission a wide range of healthcare providers to deliver the vaccine. This heterogeneity across PCTs also demands a high level of organisation between PCTs if services such as maternity care straddle PCT borders. Hospitals may not be coterminous with PCTs and hence infants from PCTs with different policies and practices can be born in the same hospital. In this light, it is of concern that many PCTs don't have service level agreements (SLA) to organise BCG administration either within the PCT and across boundaries.[4] This and the complexity of managing a localised service could also explain why some PCTs were unable to deliver BCG during periods where service providers changed.

1  
2  
3  
4  
5  
6  
7 The commissioning of BCG may become more complex if it becomes the responsibility of  
8 Clinical Commissioning Consortia. In its current form, the suggested changes to the NHS  
9 structure could lead to consortia responsible for overlapping geographical areas. If services  
10 are not commissioned across boundaries and responsibilities are not clearly assigned, the  
11 current heterogeneity in policies and practices could increase and seriously compromise the  
12 targeted infant vaccination. Infant hepatitis B vaccination is another selective programme,  
13 being given to infants of mothers screened antenatally and found to be positive for hepatitis B  
14 carriage. It works best when there is an identified person in each area, who is responsible for  
15 co-ordinating the programme.[16] This model should be considered for the BCG programme.  
16  
17

18  
19  
20 While the structural organisation of the NHS poses challenges for the 2005 recommendations,  
21 the implementation of a targeted vaccination policy is, in its self, demanding.[17] Hence, it is  
22 vital to monitor the implementation to assure high vaccination coverage. Good data on BCG  
23 immunisation coverage is complicated to assemble in PCTs with targeted infant vaccination  
24 where the denominator is unclear. Data from audits, however, show that vaccination  
25 coverage in areas with targeted infant vaccination can be low [18] and that even in PCTs with  
26 high coverage, it can vary greatly between maternity units [19] and ethnic groups.[20] We  
27 find that a wide range of health care professionals are involved in the identification of eligible  
28 children. It is therefore conceivable that infants are not identified due to unclear  
29 responsibilities. In addition, our findings suggest that some health professionals involved in  
30 the BCG vaccination program might be unfamiliar with recommended eligibility criteria; this  
31 could contribute to low coverage rates.[21] A standardised pathway to identify eligible infants,  
32 with clear responsibilities and roles and regular training of staffs involved could contribute to  
33 high vaccination coverage in PCTs with selective vaccination policy.[22, 23]  
34  
35  
36  
37  
38  
39  
40

41 In addition to the correct identification of infants at risk, assuring that the vaccine is  
42 administered is another challenge of a targeted vaccination policy.[17, 22] Half of the PCTs  
43 vaccinate on postnatal wards – a vaccine delivery pathway associated with high vaccination  
44 coverage in local audits.[22-24] The other half, however, vaccinate in a community setting or  
45 clinics which in this survey was associated with vaccination at an older age. The different  
46 delivery pathways probably reflect local circumstances. Immunising newborns in postnatal  
47 wards may be more optimal in conditions in which the workload is manageable at that level,  
48 with either a relatively lower number of eligible newborns, or a sufficient number of skilled  
49 personnel to administer BCG. Vaccinating in the community might be more effective in areas  
50 with higher numbers of eligible newborn (especially if universal BCG vaccination) and limited  
51  
52  
53  
54  
55  
56  
57  
58  
59  
60

1  
2  
3  
4  
5  
6  
7 number of trained staffs to administer the vaccine in postnatal wards. However, the latter  
8 could mean a higher risk of attrition as parents may not return their children to immunisation  
9 appointments, as reported in previous audits.[23, 25] A study in South London found that  
10 parents would be more interested if the vaccine was accessible on a “drop-in” basis from  
11 community clinics [18] in such areas.  
12

13  
14 Another aspect that might affect efficient delivery is that the most commonly used systems for  
15 documentation of BCG receipt are often not the systems used to flag up eligibility. Aligning  
16 the systems used to identify eligible children with the system used to document BCG  
17 vaccination could be an effective way to ensure that identified infants receive the vaccine and  
18 a means to estimate coverage.[24] Also, BCG vaccination was not delivered with other routine  
19 infant vaccinations possibly because of the need for specific training for an intradermal  
20 vaccination. The addition of BCG vaccination to the offer of other routine infant vaccinations  
21 in specific regions could be another way of ensuring coverage of those at risk.  
22

23  
24 The 2005 BCG policy for the UK also recommends vaccinating previously unvaccinated  
25 children who are at high risk of TB. Despite the policy, a quarter of all PCTs do not report  
26 vaccinating outside infancy. Although the absence of vaccination outside infancy may  
27 conserve resources in areas with low levels of migration, some PCTs in urban centres with  
28 presumably high levels of migration do not report vaccinating outside infancy. This suggests  
29 that greater efforts are needed to strengthen targeted BCG vaccination outside infancy.  
30

31  
32 In conclusion, a targeted infant BCG vaccination has been implemented in most PCTs across  
33 England, either as part of postnatal hospital care or a community vaccination programme  
34 separate from other childhood vaccinations via a number of locally agreed health-care  
35 professionals. Information to assess coverage would be useful to monitor successful  
36 provision of an effective measure to prevent childhood tuberculosis.  
37  
38

#### 39 40 41 42 43 44 45 46 **ACKNOWLEDGEMENTS**

47  
48 The authors wish to thank all who took part in the survey. We also thank Ms Joanne White  
49 from the HPA-Colindale for providing the list of immunisation leads in PCTs, as well as useful  
50 discussions on BCG vaccine delivery in the UK. PM and PND thank NIHR (HTA) for funding. IA  
51 is funded through an NIHR Senior Research Fellowship.  
52  
53  
54

## COMPETING INTERESTS

"All authors have completed the Unified Competing Interest form at [www.icmje.org/coi\\_disclosure.pdf](http://www.icmje.org/coi_disclosure.pdf) (available on request from the corresponding author) and declare: no support from any organisation for the submitted work other than mentioned in acknowledgements; no financial relationships with any organisations that might have an interest in the submitted work in the previous 3 years; no other relationships or activities that could appear to have influenced the submitted work."

## CONTRIBUTION OF AUTHORS

PM, IA, LR had the initial idea for the study and design the survey instrument with DE. VE and DP helped test the instrument. DP collected responses, analysed and interpreted them and did the initial draft of the manuscript. PND helped with data collection, analysis, and with DP and PM interpreted the results and edited the manuscript. JW contributed to the interpretation of results. All authors contributed to the final manuscript. All authors had access to all data in the study and held final responsibility for the decision to submit for publication.

## FUNDING

This study received no specific financial support.

## COPYRIGHT

"The Corresponding Author has the right to grant on behalf of all authors and does grant on behalf of all authors, an exclusive licence (or non-exclusive for government employees) on a worldwide basis to the BMJ Group and co-owners or contracting owning societies (where published by the BMJ Group on their behalf), and its Licensees to permit this article (if accepted) to be published in BMJ Thorax and any other BMJ Group products and to exploit all subsidiary rights, as set out in our licence."

## REFERENCES

1. Health Protection Agency. Tuberculosis in the UK: annual report on tuberculosis surveillance in the UK 2010. London: HPA2010.
2. Abubakar I, Lipman M, Anderson C, et al. Tuberculosis in the UK--time to regain control. *BMJ*. 2011;**343**:d4281.
3. B.C.G. AND vole bacillus vaccines in the prevention of tuberculosis in adolescents; first (progress) report to the Medical Research Council by their Tuberculosis Vaccines Clinical Trials Committee. *Br Med J*. 1956;**1**:413-27.

4. The Standing Medical Advisory Committee for the Central Health Services Council, The Secretary of State for Social Services, The Secretary of State for Scotland, et al. Immunisation against infectious disease. London: Department of Health and Social Security; 1972.
5. Joint Committee on Vaccination and Immunisation. Minutes of the JCVI BCG Subgroup, Thursday 7 April 2005. 2005.
6. Fine P. Stopping routine vaccination for tuberculosis in schools. *BMJ*. 2005;**331**:647-8.
7. Criteria for discontinuation of vaccination programmes using Bacille Calmette-Guerin (BCG) in countries with a low prevalence of tuberculosis. A statement of the International Union Against Tuberculosis and Lung Disease. *Tuber Lung Dis*. 1994;**75**:179-80.
8. Department of Health. Tuberculosis. In: Salisbury D, Ramsay M, Noakes K, editors. Immunisation against Infectious Diseases. Norwich: The Stationery Office; 2006.
9. Health Protection Agency. Geography - TB data by UK primary care organisation. 2010 [cited 2011 September]; Available from: [http://www.hpa.org.uk/web/HPAweb&HPAwebStandard/HPAweb\\_C/1287147465528](http://www.hpa.org.uk/web/HPAweb&HPAwebStandard/HPAweb_C/1287147465528).
10. Ahmed AB, King K. Change in BCG Vaccination policy – Unresolved Issues of implementation. *BMJ*. 2005.
11. Department of Health. Operational note to profession *Changes to the BCG vaccination programme in England*. 2005.
12. Ruwende JE, Sanchez-Padilla E, Maguire H, et al. Recent trends in tuberculosis in children in London. *J Public Health (Oxf)*. 2011;**33**:175-81.
13. Eriksen J, Chow JY, Mellis V, et al. Protective effect of BCG vaccination in a nursery outbreak in 2009: time to reconsider the vaccination threshold? *Thorax*. 2010;**65**:1067-71.
14. Miller CL, Morris J, Pollock TM. PHLS inquiry into current BCG vaccination policy. *Br Med J (Clin Res Ed)*. 1984;**288**:564.
15. Joseph CA, Watson JM, Fern KJ. BCG immunisation in England and Wales: a survey of policy and practice in schoolchildren and neonates. *BMJ*. 1992;**305**:495-8.
16. National Institute for Health and Clinical Excellence. NICE public health guidance 21: Reducing differences in the uptake of immunisations (including targeted vaccination) among children and young people aged under 19 years. 2009.
17. Smith CP, Parle M, Morris DJ. Implementation of government recommendations for immunising infants at risk of hepatitis B. *BMJ*. 1994;**309**:1339.
18. Tseng E, Nesbitt A, O'Sullivan D. Audit of the implementation of selective neonatal BCG immunisation in south east London. *Commun Dis Rep CDR Rev*. 1997;**7**:R165-8.
19. Etuwewe O, Wood A, Lyon A. Delivering a selective neonatal BCG vaccination programme in a multi-ethnic community: an audit of the neonatal BCG immunisation programme in Birmingham and Solihull. *Commun Dis Public Health*. 2004;**7**:172-6.
20. Srinivasan R, Menon L, Stevens P, et al. Ethnic differences in selective neonatal BCG immunisation: white British children miss out. *Thorax*. 2006;**61**:247-9.
21. Gordon M, Roberts H, Odeka E. Knowledge and attitudes of parents and professionals to neonatal BCG vaccination in light of recent UK policy changes: a questionnaire study. *BMC Infect Dis*. 2007;**7**:82.
22. Ahmed S, Hicks NR, Stanwell-Smith R. Policy and practice--an audit of neonatal BCG immunization in Avon. *J Public Health Med*. 1992;**14**:389-92.
23. Gill J, Scott J. Improving the uptake of selective neonatal BCG immunisation. *Commun Dis Public Health*. 1998;**1**:281-2.
24. Chappel D, Fernandes V. Improving the coverage of neonatal BCG vaccination. *J Public Health Med*. 1996;**18**:308-12.
25. Bakshi D, Sharief N. Selective neonatal BCG vaccination. *Acta Paediatr*. 2004;**93**:1207-9.

1  
2  
3  
4  
5  
6  
7 **Box:** What does this paper adds  
8

9 What is known  
10

11 An important control measure, especially in the era of multidrug resistant tuberculosis, is BCG  
12 vaccination. In 2005 the UK moved from a school aged universal BCG vaccination policy to  
13 a targeted policy towards children at high risk. To date, it is unknown how this vaccination  
14 policy is operating at the local level (via Primary Care Trusts, PCTs)  
15  
16

17 What this study adds  
18

19 Targeted infant vaccination has been implemented in most areas in England, but delivery  
20 pathways are complex and appear to vary between PCTs. Areas with selective infant  
21 vaccination provide BCG vaccine via a larger number of healthcare providers than those with  
22 universal infant vaccination policies. These findings emphasize the need to standardize local  
23 pathways, allocate clear responsibilities and to monitor vaccination coverage.  
24  
25  
26  
27  
28  
29  
30  
31  
32  
33  
34  
35  
36  
37  
38  
39  
40  
41  
42  
43  
44  
45  
46  
47  
48  
49  
50  
51  
52  
53  
54  
55  
56  
57  
58  
59  
60



1  
2  
3  
4  
5  
6  
7  
8  
9  
10  
11  
12  
13  
14  
15  
16  
17  
18  
19  
20  
21  
22  
23  
24  
25  
26  
27  
28  
29  
30  
31  
32  
33  
34  
35  
36  
37  
38  
39  
40  
41  
42  
43  
44  
45  
46  
47  
48  
49  
50  
51  
52  
53  
54  
55  
56  
57  
58  
59  
60

Figure 1. Principal systems used to document BCG vaccination and their combinations in PCTs with infant vaccination policy (N=123).

For peer review only

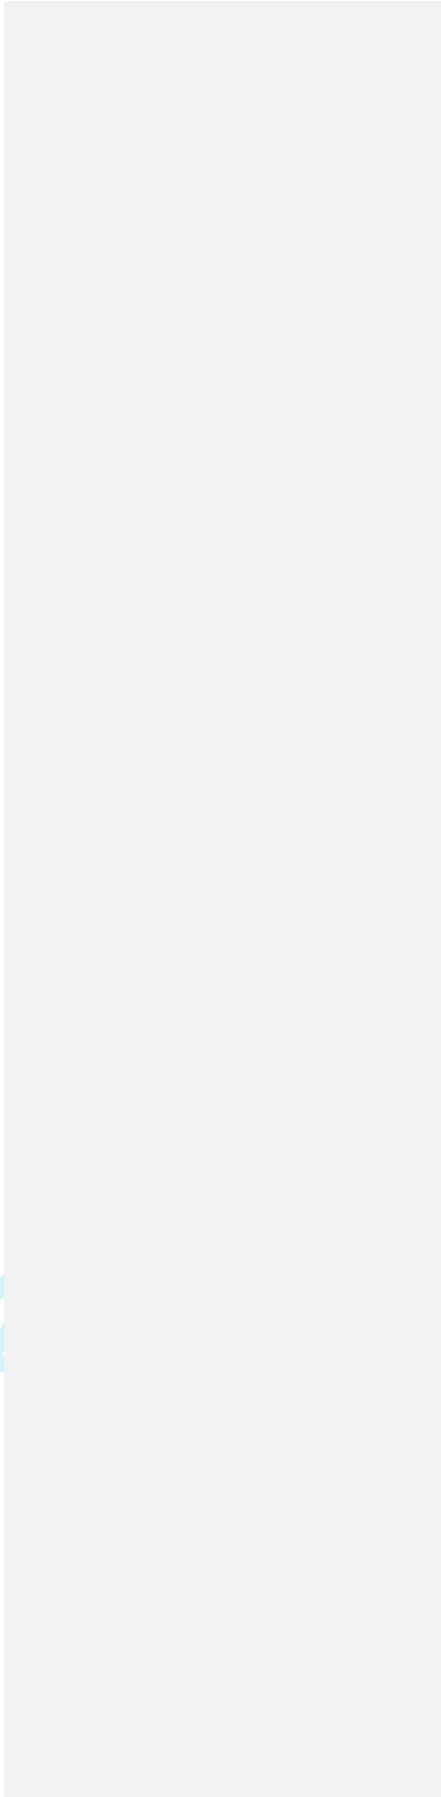

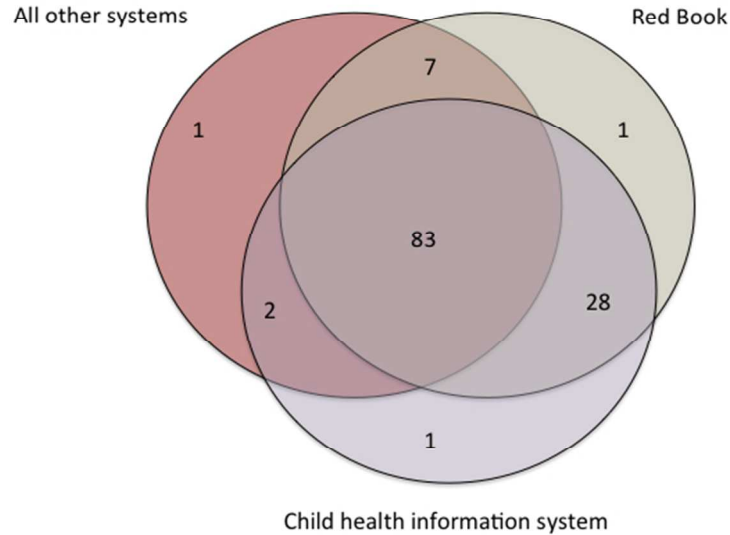

Principal systems used to document BCG vaccination and their combinations in PCTs with infant vaccination policy (N=123).  
254x190mm (72 x 72 DPI)

ew only

1  
2  
3  
4  
5  
6  
7  
8  
9  
10  
11  
12  
13  
14  
15  
16  
17  
18  
19  
20  
21  
22  
23  
24  
25  
26  
27  
28  
29  
30  
31  
32  
33  
34  
35  
36  
37  
38  
39  
40  
41  
42  
43  
44  
45  
46  
47  
48  
49  
50  
51  
52  
53  
54  
55  
56  
57  
58  
59  
60

## Questionnaire

### Part 0. PCT and contact details:

Name of PCT:

|  |
|--|
|  |
|--|

#### 1.Details of person completing questionnaire

|                                                 |  |
|-------------------------------------------------|--|
| Name                                            |  |
| Title:                                          |  |
| Responsible for:<br>(e.g. child health records) |  |
| Contact details:                                |  |

2. Are there other people responsible now for local BCG vaccine policy or BCG vaccine data we should contact? (We will ask about past policy later. There are also extra spaces at the end of this questionnaire to add names of people who may have information about the past)

|                  |  |
|------------------|--|
| Name             |  |
| Title:           |  |
| Responsible for: |  |
| Contact details: |  |

|                  |  |
|------------------|--|
| Name             |  |
| Title:           |  |
| Responsible for: |  |
| Contact details: |  |

### Part 1. Recent and current infant vaccination Policy

(Please fill in by adding an "x" to all that apply)

1. a. What was BCG vaccine policy in this PCT after the national school-aged BCG vaccination programme was discontinued in 2005?

All infants  None  Selected infant groups\*  Opportunistic (in >1 year olds)

School-aged  Not sure

Other (please specify) .....

\*to those at "high risk" e.g. parent/grandparent originating from a high incidence country

b. Is this your current policy?

Yes  No

c. If No, what is the current BCG vaccine policy in this PCT?

All infants  None  Selected infant groups  Opportunistic (in >1 year olds)

School-aged  Not sure

and in what year did the current policy start? .....

2.a. If BCG vaccination is offered in this PCT to any infants (either to selected groups or all infants), at what age is it **usually** given?

0-6 days  from 1 week to 1 month  from 1 month to 2 months

from 2 months to 3 months  from 3 months to 1 year

Other (please specify) .....

b. If BCG is given at or after 2 months, is it given at the same time as the routine childhood immunisations in this PCT?

Yes  No  Not sure

1  
2  
3  
4  
5  
6  
7  
8  
9  
10  
11  
12  
13  
14  
15  
16  
17  
18  
19  
20  
21  
22  
23  
24  
25  
26  
27  
28  
29  
30  
31  
32  
33  
34  
35  
36  
37  
38  
39  
40  
41  
42  
43  
44  
45  
46  
47  
48  
49  
50  
51  
52  
53  
54  
55  
56  
57  
58  
59  
60

c. If this PCT vaccinates any groups of infants, where is it **primarily** carried out? (tick **one** box)

Post natal ward by midwife or paediatrician?

At home by health visitor, midwife or specialist TB nurse?

At a community paediatric clinic by staff nurses or health visitor?

At the chest clinic?

At hospital paediatric clinic?

Other (please specify).....

d. **Where else** is BCG vaccination in infants given? (tick **all** boxes that apply)

Post natal ward by midwife or paediatrician?

At home by health visitor, midwife or specialist TB nurse?

At a community paediatric clinic by staff nurses or health visitor?

At the chest clinic?

At hospital paediatric clinic?

Other (please specify).....

e. When BCG is administered, where is documentation maintained? Roughly what year did this start? (please add a "x" to all that apply)

| Ways of recording receipt of vaccine                               | Yes | No | If Yes since about what year | Not sure when |
|--------------------------------------------------------------------|-----|----|------------------------------|---------------|
| In electronic antenatal/maternity records                          |     |    |                              |               |
| Paper antenatal/maternity records                                  |     |    |                              |               |
| In electronic birth notification records                           |     |    |                              |               |
| In paper birth notification records                                |     |    |                              |               |
| In electronic child health information systems                     |     |    |                              |               |
| In paper child health information records                          |     |    |                              |               |
| In the child's "red book" (Parent Held Child Health Record, PHCHR) |     |    |                              |               |
| In paper log books held by midwives                                |     |    |                              |               |
| In electronic school health records                                |     |    |                              |               |
| Microfiched school health records                                  |     |    |                              |               |
| GP Medical Notes (manual)                                          |     |    |                              |               |
| GP Computer System                                                 |     |    |                              |               |
| Discharge letter from hospital                                     |     |    |                              |               |
| Other                                                              |     |    |                              |               |

3. Were there any years **since** 2005 when BCG vaccine to infants was not given in this PCT for logistical or other reasons?

Yes  No  Not sure

If Yes, please state year(s) and the reasons

.....

**PLEASE GO TO PAGE 8 (PART 2, QUESTION 6) IF THIS PCT'S POLICY IS UNIVERSAL INFANT VACCINATION**

4. If **selected** infant groups are offered BCG vaccine in this PCT

a. Which groups are offered the vaccine? (please add a "x" to all that apply)

| Risk groups                                                                                   | Yes | No |
|-----------------------------------------------------------------------------------------------|-----|----|
| Infant of a parent or grandparent born in a country with incidence of TB above 40 per 100,000 |     |    |
| Prolonged travel to a high incidence country for more than three months                       |     |    |
| Children in insecure accommodation or part of traveller household                             |     |    |
| Close contacts with someone who has had TB                                                    |     |    |
| Infants in socially deprived households                                                       |     |    |
| Parental request for BCG                                                                      |     |    |
| Other (please specify)                                                                        |     |    |

b. When and by whom are (potentially) eligible children in the selected groups primarily identified in this PCT? (please tick **one** box)

Before birth by midwife

Yes  No

After birth by midwife

Yes  No

After birth by paediatrician at post natal assessment

Yes  No

After birth by health visitor

Yes  No

After birth by General Practice staff responsible for childhood immunisations

Yes  No

Not sure

Other (please specify).....

c. Where is eligibility noted/flagged by this PCT, and roughly what year did this start? (please tick all that apply)

| Ways of recording eligibility                  | Yes | No | Since about the year: | Not sure about when |
|------------------------------------------------|-----|----|-----------------------|---------------------|
| In electronic antenatal/maternity records      |     |    |                       |                     |
| In paper antenatal/maternity records           |     |    |                       |                     |
| In the baby's hospital notes                   |     |    |                       |                     |
| In electronic birth notification records       |     |    |                       |                     |
| In paper birth notification records            |     |    |                       |                     |
| In the child's "red book" (PHCHR)              |     |    |                       |                     |
| In electronic child health information systems |     |    |                       |                     |
| In paper child health information records      |     |    |                       |                     |
| Other (please specify)                         |     |    |                       |                     |

5. Is the assessment to identify the selected infant groups noted above in question 4 done routinely for all infants born in this PCT?

Yes  No  Not sure



## Part 2: Recent and current vaccination policy outside infancy

6. Do you carry out BCG vaccination in pre-school-aged or in school-aged children (“opportunistic vaccination”)?

Yes  No

If No, go to page 10 (part 3, question 8)

a. If Yes, when did the current programme of offering BCG in >1 year olds start? (please state year).....

b. Please specify who is primarily responsible for identifying eligible children for BCG vaccination in pre-school-aged children?

Health visitors Yes  No

GP Yes  No

Other (please specify).....

c. Please specify who is primarily responsible for identifying eligible children BCG vaccination in school-aged children?

School nurses (e.g. by school entry questionnaire) Yes  No

GP Yes  No

Other (please specify).....

d. Is BCG vaccination of school-aged children **primarily** done in children attending:

Primary schools  Secondary schools  Both schools  Not sure

e. What does this PCT accept as satisfactory evidence of previous BCG vaccination when deciding if a child might need BCG vaccination in over one year olds?

Documentary evidence alone Yes  No

Parental testimony alone Yes  No

Scar alone Yes  No

Parental testimony and scar Yes  No

1  
2  
3  
4  
5 **7.a.** If you routinely vaccinate any groups of **school-aged** children, is prior Mantoux testing  
6 normally carried out?  
7

8 Yes  No   
9

10  
11 **b.** Where is school-aged BCG vaccine **primarily** given?  
12

13  
14 At school by the school nurses

Yes  No

15  
16 At a community paediatric clinic by staff nurses or health visitor

Yes  No

17  
18 At the chest clinic

Yes  No

19  
20  
21 Other (please specify).....  
22  
23  
24  
25  
26  
27  
28  
29  
30  
31  
32  
33  
34  
35  
36  
37  
38  
39  
40  
41  
42  
43  
44  
45  
46  
47  
48  
49  
50  
51  
52  
53  
54  
55  
56  
57  
58  
59  
60

For peer review only

### Part 3. History of BCG policy and practice

We are interested in local policies for infant and adolescent BCG vaccination in order to decide who to include in a new study of how long BCG vaccine protects against TB disease. We are trying to find out what policy was locally from 1968 to 2005. We do realise this may be difficult given the number of changes but we would appreciate you completing as much as you can even if you do not have information on the whole of the time period. We will ask later for names of people who may have more information.

**8.** School-aged BCG vaccination was routine in many areas from 1950s to 2005 when it was discontinued. Do you think this was routine policy from 1968 to 2005 in the areas now covered by the present PCT(s)?

Yes  No  Not sure

**a.** Several local areas had interruptions of either BCG vaccine supply or material to test for TB infection. We realise that there may have been several boundary changes as well over time but do you know if there were years (before 2005) in which the school-aged vaccination programme was suspended or discontinued in the areas (partially or fully) covered by the present PCT?

Yes  No  Not sure

If Yes, please state which years prior to 2005 in which school-aged BCG vaccination was not given and in which district/area health authorities/PCTs

.....

**b.** Primary care groups and then primary care trusts were created in 2002. What area health authority was this PCT in before these changes?

.....

Not sure

**c.** Where there other boundary changes that occurred in the time period 2002 until today?

Yes  No  Not sure

**d.** If Yes please specify what and when

.....

.....

9. Did these district/area health authorities/PCTs also routinely offer BCG vaccination in infancy or to children before the age of 11 before 2005?

Yes, universal infant  year started.....

Yes, selected infant  year started.....

Yes, opportunistic vaccination  year started.....

No

10. Some district/areas used jet injectors as well or instead of needle and syringe around the late 1970s.

Did these district/area health authorities/PCTs ever use jet injectors?

Yes  No  Not sure

If Yes,

a. Do you know approximately during which years jet injectors were used?

Year started.....to year ending..... (inclusive)

For peer review only

1  
2  
3  
4  
5  
6  
7  
8  
9  
10  
11  
12  
13  
14  
15  
16  
17  
18  
19  
20  
21  
22  
23  
24  
25  
26  
27  
28  
29  
30  
31  
32  
33  
34  
35  
36  
37  
38  
39  
40  
41  
42  
43  
44  
45  
46  
47  
48  
49  
50  
51  
52  
53  
54  
55  
56  
57  
58  
59  
60

11. Records of school-aged vaccinations or midwifery records of infant BCG vaccines given are kept routinely till after the child leaves school usually to at least the age of 25 years. We would like to know about the availability of any past individual records on BCG vaccinations in infants or children any time from now to 1968.

Do you know if the following historical records might be available? (please tick all that apply)

| Ways of recording vaccine receipt                        | Yes | No | If Yes, from what year to what year? | Not sure when |
|----------------------------------------------------------|-----|----|--------------------------------------|---------------|
| In electronic antenatal/maternity records                |     |    |                                      |               |
| Paper antenatal/maternity records                        |     |    |                                      |               |
| In electronic birth notification records                 |     |    |                                      |               |
| In paper birth notification records                      |     |    |                                      |               |
| In electronic child health information systems           |     |    |                                      |               |
| In paper or microfiched child health information records |     |    |                                      |               |
| In the child's "red book" (PHCHR)                        |     |    |                                      |               |
| In paper log books held by midwives                      |     |    |                                      |               |
| In paper log books held by health visitors               |     |    |                                      |               |
| In electronic school health records                      |     |    |                                      |               |
| Microfiched school health records                        |     |    |                                      |               |
| Paper child health records                               |     |    |                                      |               |
| Other (please specify:                                   |     |    |                                      |               |

**a. Who could we contact to ask about these records?**

|                                                   |  |
|---------------------------------------------------|--|
| Name                                              |  |
| Title:                                            |  |
| Responsible for:                                  |  |
| Contact details:<br>Address<br>Telephone<br>Email |  |

**b. If you currently have electronic child health records that capture BCG vaccination, What system is it and how long have you had it in the current format?**

.....system.....years

**c. Do you know what systems were in place before then?**

.....system from .....year to .....year

**d. Have records in the old system been copied into the current system?**

Yes  No  Not sure

**12. We are also interested in whether there are any past written reports or audits of coverage by infant and adolescent BCG vaccination in your area/PCT between 1968 to now.**

**a. Do you know of any reports or audits on past overall PPD positive rates and/or BCG vaccination uptake rates in your area or region?**

Yes  No  Not sure

**b. Who might we contact for any such reports?**

|                  |  |
|------------------|--|
| Name             |  |
| Title:           |  |
| Responsible for: |  |
| Contact details: |  |

1  
2  
3  
4 Thank you for your time. We realise BCG vaccination policy has changed over a large number  
5 of years and have varied often depending on the local epidemiology of TB and availability of  
6 testing and vaccines. The next part gives you some space if you wish to add more details.  
7  
8  
9

10  
11 How and why did BCG policy change in your area since 1968? (please could you add any  
12 changes in the administrative boundaries i.e. changes in the catchment population)  
13  
14

15  
16  
17  
18  
19  
20  
21

22  
23  
24 Please use this space if you can let us know any more about where any BCG vaccine records  
25 might be stored or archived.  
26  
27

28  
29  
30  
31  
32  
33  
34

35  
36  
37 If you think there is anyone else you have not mentioned before you think we should contact  
38 please use the space below.  
39  
40

|                                                                              |  |
|------------------------------------------------------------------------------|--|
| 41 Name                                                                      |  |
| 42                                                                           |  |
| 43 Title:                                                                    |  |
| 44                                                                           |  |
| 45                                                                           |  |
| 46 Responsible for:<br>47 (e.g. past infant<br>48 vaccination<br>49 records) |  |
| 50                                                                           |  |
| 51 Contact details:                                                          |  |
| 52                                                                           |  |
| 53                                                                           |  |
| 54                                                                           |  |
